# Supplementary material for: Uncovering the potential of novel micromonosporae isolated from an extreme hyper-arid Atacama Desert soil
Source: PubMed Central journal article supplement (PMC6423291; doi:10.1038/s41598-019-38789-z), 2019-03-18
Supplement: 41598_2019_38789_MOESM1_ESM.pdf [file 41598_2019_38789_MOESM1_ESM.pdf]

# **Uncovering the potential of novel micromonosporae isolated from an extreme hyper-arid Atacama Desert soil**

Lorena Carro<sup>1,2\*</sup>, Jean Franco Castro<sup>1,3</sup>, Valeria Razmilic<sup>1,3</sup>, Imen Nouioui<sup>1</sup>, Che Pan<sup>1</sup>, José M. Igual<sup>4</sup>, Marcel Jaspars<sup>5</sup>, Michael Goodfellow<sup>1</sup>, Alan T. Bull<sup>6</sup>, Juan A. Asenjo<sup>3</sup>, Hans-Peter Klenk<sup>1</sup>

<sup>1</sup> School of Natural and Environmental Sciences, Newcastle University, Newcastle-upon Tyne, UK.

<sup>2</sup> Microbiology and Genetics Department, University of Salamanca. Salamanca, Spain.

<sup>3</sup> Centre for Biotechnology and Bioengineering (CeBiB), Department of Chemical Engineering, Biotechnology and Materials, Universidad de Chile, Beauchef 851, Santiago, Chile.

<sup>4</sup> Instituto de Recursos Naturales y Agrobiología de Salamanca, Consejo Superior de Investigaciones Científicas (IRNASA-CSIC), Salamanca, Spain.

<sup>5</sup> Marine Biodiscovery Centre, Department of Chemistry, University of Aberdeen, Scotland, UK

<sup>6</sup> School of Biosciences, University of Kent, Canterbury, UK

\* [lcg@usal.es](mailto:lcg@usal.es)



**Table S2.** Bioclusters detected in the genomes of the *Micromonospora* isolates using antiSMASH.***Micromonospora* sp. LB4**

| Cluster    | Type          | Most similar known cluster                                                 | MIBiG BGC-ID  |
|------------|---------------|----------------------------------------------------------------------------|---------------|
| Cluster 1  | Lantipeptide  | -                                                                          | -             |
| Cluster 2  | Siderophore   | Desferrioxamine_B_biosynthetic_gene_cluster (80% of genes show similarity) | BGC0000941_c1 |
| Cluster 3  | Cf_putative   | -                                                                          | -             |
| Cluster 4  | Cf_fatty_acid | -                                                                          | -             |
| Cluster 5  | Cf_fatty_acid | -                                                                          | -             |
| Cluster 6  | Terpene       | -                                                                          | -             |
| Cluster 7  | Nrps          | -                                                                          | -             |
| Cluster 8  | Other         | Diazepinomicin_biosynthetic_gene_cluster (12% of genes show similarity)    | BGC0000679_c1 |
| Cluster 9  | Cf_putative   | Coumermycin_A1_biosynthetic_gene_cluster (12% of genes show similarity)    | BGC0000833_c1 |
| Cluster 10 | Cf_putative   | -                                                                          | -             |
| Cluster 11 | Nrps          | -                                                                          | -             |
| Cluster 12 | Cf_putative   | -                                                                          | -             |
| Cluster 13 | Terpene       | Lymphostin_biosynthetic_gene_cluster (25% of genes show similarity)        | BGC0001006_c1 |
| Cluster 14 | Cf_saccharide | -                                                                          | -             |
| Cluster 15 | Cf_putative   | Svaricin_biosynthetic_gene_cluster (6% of genes show similarity)           | BGC0001382_c1 |
| Cluster 16 | Cf_putative   | -                                                                          | -             |
| Cluster 17 | Cf_putative   | Diazepinomicin_biosynthetic_gene_cluster (20% of genes show similarity)    | BGC0000679_c1 |
| Cluster 18 | Terpene       | -                                                                          | -             |
| Cluster 19 | Nrps          | -                                                                          | -             |
| Cluster 20 | T3pks         | -                                                                          | -             |
| Cluster 21 | Cf_fatty_acid | -                                                                          | -             |
| Cluster 22 | Otherks       | Naphthyridinomycin_biosynthetic_gene_cluster (7% of genes show similarity) | BGC0000394_c1 |
| Cluster 23 | Other         | -                                                                          | -             |
| Cluster 24 | Cf_putative   | -                                                                          | -             |
| Cluster 25 | Other         | Microcystin_biosynthetic_gene_cluster (30% of genes show similarity)       | BGC0001016_c1 |
| Cluster 26 | Cf_putative   | -                                                                          | -             |
| Cluster 27 | Cf_putative   | Phosphonoglycans_biosynthetic_gene_cluster (5% of genes show similarity)   | BGC0000806_c1 |
| Cluster 28 | T2pks         | Frankiamicin_biosynthetic_gene_cluster (21% of genes show similarity)      | -             |

***Micromonospora* sp. LB19**

| Cluster    | Type          | Most similar known cluster                                                                   | MIBiG BGC-ID        |
|------------|---------------|----------------------------------------------------------------------------------------------|---------------------|
| Cluster 1  | T2pks         | Pradimicin_biosynthetic_gene_cluster (21% of genes show similarity)                          | BGC0001394_c1       |
| Cluster 2  | Cf_putative   | -                                                                                            | BGC0000026_c1       |
| Cluster 3  | Lasso peptide | -                                                                                            | BGC0000202_c1       |
| Cluster 4  | Cf_putative   | Lobosamide_biosynthetic_gene_cluster (6% of genes show similarity)                           | BGC0000679_c1       |
| Cluster 5  | Cf_putative   | -                                                                                            | -                   |
| Cluster 6  | Head_to_tail  | -                                                                                            | BGC0000394_c1       |
| Cluster 7  | Cf_putative   | -                                                                                            | BGC0000679_c1       |
| Cluster 8  | Cf_putative   | Fengycin_biosynthetic_gene_cluster (20% of genes show similarity)                            | BGC0000354_c1       |
| Cluster 9  | Cf_putative   | -                                                                                            | -                   |
| Cluster 10 | Cf_saccharide | -                                                                                            | BGC0000807_c1       |
| Cluster 11 | Cf_putative   | Clarepoxcin_biosynthetic_gene_cluster (10% of genes show similarity)                         | -                   |
| Cluster 12 | Cf_putative   | -                                                                                            | -                   |
| Cluster 13 | Cf_saccharide | Coumermycin_A1_biosynthetic_gene_cluster (12% of genes show similarity)                      | -                   |
| Cluster 14 | Siderophore   | -                                                                                            | BGC0000078_c1       |
| Cluster 15 | Cf_fatty_acid | Alnumycin_biosynthetic_gene_cluster (6% of genes show similarity)                            | -                   |
| Cluster 16 | Cf_putative   | Friulimicin_biosynthetic_gene_cluster (6% of genes show similarity)                          | -                   |
| Cluster 17 | Cf_putative   | -                                                                                            | -                   |
| Cluster 18 | Cf_putative   | -                                                                                            | -                   |
| Cluster 19 | Cf_putative   | -                                                                                            | BGC0001011_c1       |
| Cluster 20 | Terpene       | Phosphonoglycans_biosynthetic_gene_cluster (3% of genes show similarity)                     | BGC0000279_c1       |
| Cluster 21 | Cf_putative   | Pyrralomycin_biosynthetic_gene_cluster (5% of genes show similarity)                         | BGC0001036_c1       |
| Cluster 22 | Cf_saccharide | -                                                                                            | -                   |
| Cluster 23 | Cf_putative   | -                                                                                            | -                   |
| Cluster 24 | Cf_putative   | Meilingmycin_biosynthetic_gene_cluster (2% of genes show similarity)                         | -                   |
| Cluster 25 | T3pks         | Alkyl-O-Dihydrogeranyl-Methoxyhydroquinones_biosynthetic_gene (71% of genes show similarity) | BGC0000963_c1       |
| Cluster 26 | Cf_fatty_acid | Paromomycin_biosynthetic_gene_cluster (5% of genes show similarity)                          | <b>MIBiG BGC-ID</b> |
| Cluster 27 | Cf_fatty_acid | Avilamycin_A_biosynthetic_gene_cluster (5% of genes show similarity)                         | BGC0001007_c1       |
| Cluster 28 | Cf_putative   | -                                                                                            | BGC0000705_c1       |
| Cluster 29 | Cf_putative   | Kanamycin_biosynthetic_gene_cluster (15% of genes show similarity)                           | -                   |
| Cluster 30 | Cf_putative   | -                                                                                            | BGC0000087_c1       |
| Cluster 31 | Lantipeptide  | -                                                                                            | BGC0001303_c1       |
| Cluster 32 | Thiopeptide   | K-252a_biosynthetic_gene_cluster (5% of genes show similarity)                               | BGC0000609_c1       |
| Cluster 33 | Nrps          | Albachelin_biosynthetic_gene_cluster (90% of genes show similarity)                          | BGC0000100_c1       |
| Cluster 34 | Other         | Herboxidiene_biosynthetic_gene_cluster (2% of genes show similarity)                         | BGC0000141_c1       |
| Cluster 35 | Cf_putative   | Actagardine_biosynthetic_gene_cluster (6% of genes show similarity)                          | BGC0000706_c1       |
| Cluster 36 | Lantipeptide  | Catenulipeptin_biosynthetic_gene_cluster (60% of genes show similarity)                      | -                   |
| Cluster 37 | Terpene       | -                                                                                            | BGC0001077_c1       |
| Cluster 38 | Cf_putative   | -                                                                                            | -                   |
| Cluster 39 | Cf_putative   | Kanamycin_biosynthetic_gene_cluster (15% of genes show similarity)                           | -                   |
| Cluster 40 | Cf_putative   | Esmeraldin_biosynthetic_gene_cluster (8% of genes show similarity)                           | BGC0000132_c1       |
| Cluster 41 | Cf_putative   | -                                                                                            | -                   |
| Cluster 42 | Phosphonate   | Gentamicin_biosynthetic_gene_cluster (4% of genes show similarity)                           | BGC0000105_c1       |
| Cluster 43 | Cf_putative   | -                                                                                            | -                   |
| Cluster 44 | Cf_putative   | -                                                                                            | -                   |
| Cluster 45 | Terpene       | Sioxanthin_biosynthetic_gene_cluster (100% of genes show similarity)                         | -                   |
| Cluster 46 | Cf_putative   | -                                                                                            | BGC0000833_c1       |
| Cluster 47 | Cf_putative   | Teichomycin_biosynthetic_gene_cluster (11% of genes show similarity)                         | BGC0000340_c1       |
| Cluster 48 | Bacteriocin   | Lymphostin_biosynthetic_gene_cluster (33% of genes show similarity)                          | -                   |
| Cluster 49 | Cf_putative   | -                                                                                            | -                   |
| Cluster 50 | Cf_putative   | -                                                                                            | -                   |
| Cluster 51 | Cf_putative   | Asukamycin_biosynthetic_gene_cluster (4% of genes show similarity)                           | BGC0000137_c1       |
| Cluster 52 | Cf_putative   | -                                                                                            | -                   |

|            |                     |                                                                           |               |
|------------|---------------------|---------------------------------------------------------------------------|---------------|
| Cluster 53 | Terpene             | -                                                                         | BGC0000806_c1 |
| Cluster 54 | Cf_putative         | Sanglifehrin_A_biosynthetic_gene_cluster (4% of genes show similarity)    | -             |
| Cluster 55 | Cf_putative         | -                                                                         | -             |
| Cluster 56 | Cf_putative         | -                                                                         | -             |
| Cluster 57 | Cf_fatty_acid-T1pks | Pyrrrolomycin_biosynthetic_gene_cluster (34% of genes show similarity)    | BGC0001172_c1 |
| Cluster 58 | Cf_putative         | -                                                                         | BGC0000148_c1 |
| Cluster 59 | Cf_putative         | -                                                                         | -             |
| Cluster 60 | Cf_putative         | Kinamycin_biosynthetic_gene_cluster (8% of genes show similarity)         | -             |
| Cluster 61 | Cf_putative         | -                                                                         | -             |
| Cluster 62 | Siderophore         | -                                                                         | BGC0000033_c1 |
| Cluster 63 | Cf_putative         | -                                                                         | BGC0000806_c1 |
| Cluster 64 | Cf_saccharide       | Polysaccharide_B_biosynthetic_gene_cluster (10% of genes show similarity) | -             |

**Micromonospora sp. LB32**

| Cluster    | Type                       | Most similar known cluster                                                                   | MIBiG BGC-ID  |
|------------|----------------------------|----------------------------------------------------------------------------------------------|---------------|
| Cluster 1  | Cf_putative                | -                                                                                            | -             |
| Cluster 2  | Cf_putative                | -                                                                                            | -             |
| Cluster 3  | Cf_putative                | -                                                                                            | -             |
| Cluster 4  | Cf_putative                | WS9326_biosynthetic_gene_cluster (5% of genes show similarity)                               | BGC0001297_c1 |
| Cluster 5  | Bacteriocin                | Lymphostin_biosynthetic_gene_cluster (33% of genes show similarity)                          | BGC0001006_c1 |
| Cluster 6  | Cf_putative                | -                                                                                            | -             |
| Cluster 7  | Cf_putative                | -                                                                                            | -             |
| Cluster 8  | Cf_putative                | -                                                                                            | -             |
| Cluster 9  | Terpene                    | Phosphonoglycans_biosynthetic_gene_cluster (3% of genes show similarity)                     | BGC0000806_c1 |
| Cluster 10 | Cf_putative                | -                                                                                            | -             |
| Cluster 11 | Terpene                    | -                                                                                            | -             |
| Cluster 12 | Cf_putative                | -                                                                                            | -             |
| Cluster 13 | Cf_putative                | Azinomycin_B_biosynthetic_gene_cluster (4% of genes show similarity)                         | BGC0000960_c1 |
| Cluster 14 | Cf_putative                | -                                                                                            | -             |
| Cluster 15 | Cf_saccharide              | Polysaccharide_B_biosynthetic_gene_cluster (6% of genes show similarity)                     | BGC0001411_c1 |
| Cluster 16 | Cf_putative                | Phosphonoglycans_biosynthetic_gene_cluster (6% of genes show similarity)                     | BGC0000807_c1 |
| Cluster 17 | Cf_putative                | -                                                                                            | -             |
| Cluster 18 | Cf_putative                | -                                                                                            | -             |
| Cluster 19 | T3pks                      | Alkyl-O-Dihydrogeranyl-Methoxyhydroquinones_biosynthetic_gene (71% of genes show similarity) | BGC0001077_c1 |
| Cluster 20 | Cf_saccharide              | Coumermycin_A1_biosynthetic_gene_cluster (12% of genes show similarity)                      | BGC0000833_c1 |
| Cluster 21 | Cf_fatty_acid-Lantipeptide | Kedarcidin_biosynthetic_gene_cluster (1% of genes show similarity)                           | BGC0000081_c1 |
| Cluster 22 | Cf_fatty_acid              | Chlorizidine_A_biosynthetic_gene_cluster (7% of genes show similarity)                       | BGC0001172_c1 |
| Cluster 23 | Siderophore                | Desferrioxamine_B_biosynthetic_gene_cluster (83% of genes show similarity)                   | BGC0000940_c1 |
| Cluster 24 | Cf_putative                | -                                                                                            | -             |
| Cluster 25 | Cf_putative                | Lobosamide_biosynthetic_gene_cluster (6% of genes show similarity)                           | BGC0001303_c1 |
| Cluster 26 | Cf_putative                | Kanamycin_biosynthetic_gene_cluster (1% of genes show similarity)                            | BGC0000703_c1 |
| Cluster 27 | Cf_putative                | -                                                                                            | -             |
| Cluster 28 | Lantipeptide               | SRO15-3108_biosynthetic_gene_cluster (50% of genes show similarity)                          | BGC0000554_c1 |
| Cluster 29 | Cf_putative                | -                                                                                            | -             |
| Cluster 30 | Cf_putative                | Kanamycin_biosynthetic_gene_cluster (15% of genes show similarity)                           | BGC0000706_c1 |
| Cluster 31 | Cf_putative                | -                                                                                            | -             |
| Cluster 32 | Cf_putative                | Aclacinomycin_biosynthetic_gene_cluster (8% of genes show similarity)                        | BGC0000191_c1 |
| Cluster 33 | Cf_putative                | -                                                                                            | -             |
| Cluster 34 | Cf_saccharide              | -                                                                                            | -             |
| Cluster 35 | Cf_putative                | -                                                                                            | -             |
| Cluster 36 | Cf_putative                | Fengycin_biosynthetic_gene_cluster (20% of genes show similarity)                            | BGC0001095_c1 |
| Cluster 37 | Cf_saccharide              | Nocathiacin_biosynthetic_gene_cluster (4% of genes show similarity)                          | BGC0000609_c1 |
| Cluster 38 | Nrps                       | Azicemicin_biosynthetic_gene_cluster (4% of genes show similarity)                           | BGC0000202_c1 |
| Cluster 39 | T2pks-Cf_fatty_acid        | Pradimicin_biosynthetic_gene_cluster (25% of genes show similarity)                          | BGC0000256_c1 |
| Cluster 40 | Cf_putative                | Taromycin_biosynthetic_gene_cluster (6% of genes show similarity)                            | BGC0000439_c1 |
| Cluster 41 | Cf_saccharide-Siderophore  | Aldgamycin_biosynthetic_gene_cluster (5% of genes show similarity)                           | BGC0001396_c1 |
| Cluster 42 | Cf_putative                | -                                                                                            | -             |
| Cluster 43 | Cf_putative                | Lividomycin_biosynthetic_gene_cluster (10% of genes show similarity)                         | BGC0000708_c1 |
| Cluster 44 | Cf_putative                | -                                                                                            | -             |
| Cluster 45 | Cf_putative                | -                                                                                            | -             |
| Cluster 46 | Cf_putative                | -                                                                                            | -             |
| Cluster 47 | Cf_putative                | -                                                                                            | -             |
| Cluster 48 | Cf_putative                | -                                                                                            | -             |
| Cluster 49 | Cf_putative                | -                                                                                            | -             |
| Cluster 50 | Nrps                       | -                                                                                            | -             |
| Cluster 51 | T2pks-Siderophore          | Xantholipin_biosynthetic_gene_cluster (20% of genes show similarity)                         | BGC0000279_c1 |
| Cluster 52 | Cf_putative                | -                                                                                            | -             |
| Cluster 53 | Terpene                    | Meridamycin_biosynthetic_gene_cluster (13% of genes show similarity)                         | BGC0001011_c1 |
| Cluster 54 | Cf_putative                | Svaricin_biosynthetic_gene_cluster (6% of genes show similarity)                             | BGC0001382_c1 |

**Micromonospora sp. LB39**

| Cluster    | Type            | Most similar known cluster                                                                   | MIBiG BGC-ID  |
|------------|-----------------|----------------------------------------------------------------------------------------------|---------------|
| Cluster 1  | Cf_putative     | -                                                                                            | -             |
| Cluster 2  | Cf_putative     | Svaricin_biosynthetic_gene_cluster (6% of genes show similarity)                             | BGC0001382_c1 |
| Cluster 3  | Cf_putative     | Kanamycin_biosynthetic_gene_cluster (15% of genes show similarity)                           | BGC0000706_c1 |
| Cluster 4  | Cf_putative     | -                                                                                            | -             |
| Cluster 5  | Cf_saccharide   | Coumermycin_A1_biosynthetic_gene_cluster (12% of genes show similarity)                      | BGC0000833_c1 |
| Cluster 6  | Cf_saccharide   | -                                                                                            | -             |
| Cluster 7  | Lassoptide-Nrps | -                                                                                            | -             |
| Cluster 8  | Cf_putative     | Kirromycin_biosynthetic_gene_cluster (3% of genes show similarity)                           | BGC0001070_c1 |
| Cluster 9  | Cf_putative     | -                                                                                            | -             |
| Cluster 10 | Nrps            | -                                                                                            | -             |
| Cluster 11 | Cf_fatty_acid   | Alnumycin_biosynthetic_gene_cluster (6% of genes show similarity)                            | BGC0000195_c1 |
| Cluster 12 | Cf_putative     | -                                                                                            | -             |
| Cluster 13 | T3pks           | Alkyl-O-Dihydrogeranyl-Methoxyhydroquinones_biosynthetic_gene (71% of genes show similarity) | BGC0001077_c1 |
| Cluster 14 | Lantipeptide    | -                                                                                            | -             |

|            |                           |                                                                                      |               |
|------------|---------------------------|--------------------------------------------------------------------------------------|---------------|
| Cluster 15 | Cf_putative               | -                                                                                    | -             |
| Cluster 16 | T2pks                     | Pradimicin_biosynthetic_gene_cluster (25% of genes show similarity)                  | BGC0000256_c1 |
| Cluster 17 | Cf_putative               | Frulimicin_biosynthetic_gene_cluster (6% of genes show similarity)                   | BGC0000354_c1 |
| Cluster 18 | Cf_putative               | -                                                                                    | -             |
| Cluster 19 | Cf_putative               | -                                                                                    | -             |
| Cluster 20 | Cf_putative               | -                                                                                    | -             |
| Cluster 21 | Cf_putative               | -                                                                                    | -             |
| Cluster 22 | Cf_putative               | Calcium-dependent_antibiotic_biosynthetic_gene_cluster (5% of genes show similarity) | BGC0000315_c1 |
| Cluster 23 | Cf_putative               | -                                                                                    | -             |
| Cluster 24 | Cf_putative               | Calicheamicin_biosynthetic_gene_cluster (2% of genes show similarity)                | BGC0000033_c1 |
| Cluster 25 | Cf_saccharide             | Polysaccharide_B_biosynthetic_gene_cluster (6% of genes show similarity)             | BGC0001411_c1 |
| Cluster 26 | Siderophore               | -                                                                                    | -             |
| Cluster 27 | Cf_putative               | -                                                                                    | -             |
| Cluster 28 | Thiopeptide               | -                                                                                    | -             |
| Cluster 29 | Cf_putative               | -                                                                                    | -             |
| Cluster 30 | Cf_putative               | A40926_biosynthetic_gene_cluster (7% of genes show similarity)                       | BGC0000289_c1 |
| Cluster 31 | Cf_putative               | WS9326_biosynthetic_gene_cluster (5% of genes show similarity)                       | BGC0001297_c1 |
| Cluster 32 | Cf_putative               | Asukamycin_biosynthetic_gene_cluster (4% of genes show similarity)                   | BGC0000187_c1 |
| Cluster 33 | Cf_putative               | -                                                                                    | -             |
| Cluster 34 | T3pks-T1pks-Nrps          | Sporolide_biosynthetic_gene_cluster (44% of genes show similarity)                   | BGC0000150_c1 |
| Cluster 35 | Cf_putative               | Cyclomarin_biosynthetic_gene_cluster (8% of genes show similarity)                   | BGC0000333_c1 |
| Cluster 36 | Bacteriocin               | Lymphostin_biosynthetic_gene_cluster (33% of genes show similarity)                  | BGC0001006_c1 |
| Cluster 37 | Lantipeptide-Nrps         | Herboxidiene_biosynthetic_gene_cluster (2% of genes show similarity)                 | BGC0001065_c1 |
| Cluster 38 | Cf_putative               | -                                                                                    | -             |
| Cluster 39 | Cf_putative               | Frulimicin_biosynthetic_gene_cluster (6% of genes show similarity)                   | BGC0000354_c1 |
| Cluster 40 | Terpene                   | Phosphonoglycans_biosynthetic_gene_cluster (3% of genes show similarity)             | BGC0000806_c1 |
| Cluster 41 | Cf_putative               | -                                                                                    | -             |
| Cluster 42 | Cf_putative               | -                                                                                    | -             |
| Cluster 43 | Cf_putative               | -                                                                                    | -             |
| Cluster 44 | Cf_saccharide             | Azinomycin_B_biosynthetic_gene_cluster (4% of genes show similarity)                 | BGC0000960_c1 |
| Cluster 45 | Cf_putative               | -                                                                                    | -             |
| Cluster 46 | T2pks                     | Kinamycin_biosynthetic_gene_cluster (34% of genes show similarity)                   | BGC0000236_c1 |
| Cluster 47 | Terpene                   | -                                                                                    | -             |
| Cluster 48 | Cf_putative               | -                                                                                    | -             |
| Cluster 49 | Cf_saccharide             | Kinamycin_biosynthetic_gene_cluster (8% of genes show similarity)                    | BGC0000236_c1 |
| Cluster 50 | Cf_saccharide-Siderophore | -                                                                                    | -             |
| Cluster 51 | Terpene                   | Sioxanthin_biosynthetic_gene_cluster (40% of genes show similarity)                  | BGC0001087_c4 |
| Cluster 52 | Lantipeptide              | SapB_biosynthetic_gene_cluster (100% of genes show similarity)                       | BGC0000551_c1 |
| Cluster 53 | Cf_putative               | -                                                                                    | -             |
| Cluster 54 | Cf_saccharide             | -                                                                                    | -             |
| Cluster 55 | Cf_putative               | Pyrrrolomycin_biosynthetic_gene_cluster (5% of genes show similarity)                | BGC0000130_c1 |
| Cluster 56 | Cf_putative               | -                                                                                    | -             |
| Cluster 57 | Cf_putative               | -                                                                                    | -             |
| Cluster 58 | Cf_putative               | Fengycin_biosynthetic_gene_cluster (13% of genes show similarity)                    | BGC0001095_c1 |
| Cluster 59 | Linaridin                 | Legonaridin_biosynthetic_gene_cluster (33% of genes show similarity)                 | BGC0001188_c1 |
| Cluster 60 | Cf_saccharide             | Esmeraldin_biosynthetic_gene_cluster (8% of genes show similarity)                   | BGC0000935_c1 |
| Cluster 61 | Cf_putative               | -                                                                                    | -             |
| Cluster 62 | Cf_putative               | -                                                                                    | -             |
| Cluster 63 | Cf_putative               | -                                                                                    | -             |
| Cluster 64 | T1pks-Nrps                | Microsclerodermins_biosynthetic_gene_cluster (14% of genes show similarity)          | BGC0001231_c1 |

#### **Micromonospora sp. LB41**

| Cluster    | Type                       | Most similar known cluster                                                  |               |
|------------|----------------------------|-----------------------------------------------------------------------------|---------------|
| Cluster 1  | Cf_putative                | -                                                                           | -             |
| Cluster 2  | Lantipeptide               | -                                                                           | -             |
| Cluster 3  | Terpene                    | -                                                                           | -             |
| Cluster 4  | Cf_saccharide              | -                                                                           | -             |
| Cluster 5  | Cf_putative                | Diazepinomicin_biosynthetic_gene_cluster (15% of genes show similarity)     | BGC0000679_c1 |
| Cluster 6  | Cf_putative                | Frulimicin_biosynthetic_gene_cluster (6% of genes show similarity)          | BGC0000354_c1 |
| Cluster 7  | T2pks                      | Xantholipin_biosynthetic_gene_cluster (16% of genes show similarity)        | BGC0000279_c1 |
| Cluster 8  | Cf_fatty_acid              | Chlorizidine_A_biosynthetic_gene_cluster (7% of genes show similarity)      | BGC0001172_c1 |
| Cluster 9  | T1pks                      | Monensin_biosynthetic_gene_cluster (23% of genes show similarity)           | BGC0000100_c1 |
| Cluster 10 | Cf_putative                | -                                                                           | -             |
| Cluster 11 | T1pks                      | Rubradirin_biosynthetic_gene_cluster (6% of genes show similarity)          | BGC0000141_c1 |
| Cluster 12 | Cf_putative                | -                                                                           | -             |
| Cluster 13 | Lantipeptide               | -                                                                           | -             |
| Cluster 14 | Thiopeptide-Cf_saccharide  | -                                                                           | -             |
| Cluster 15 | T1pks-Nrps                 | Calicheamicin_biosynthetic_gene_cluster (22% of genes show similarity)      | BGC0000033_c1 |
| Cluster 16 | T1pks                      | Nanchangmycin_biosynthetic_gene_cluster (30% of genes show similarity)      | BGC0000105_c1 |
| Cluster 17 | Terpene                    | Phosphonoglycans_biosynthetic_gene_cluster (3% of genes show similarity)    | BGC0000806_c1 |
| Cluster 18 | Cf_putative                | -                                                                           | -             |
| Cluster 19 | Cf_saccharide              | -                                                                           | -             |
| Cluster 20 | Nrps-T1pks-Otherks         | Naphthyrudinomycin_biosynthetic_gene_cluster (14% of genes show similarity) | BGC0000394_c1 |
| Cluster 21 | Cf_putative                | -                                                                           | -             |
| Cluster 22 | Cf_saccharide              | Phosphonoglycans_biosynthetic_gene_cluster (14% of genes show similarity)   | BGC0000806_c1 |
| Cluster 23 | Cf_putative                | -                                                                           | -             |
| Cluster 24 | Cf_putative                | -                                                                           | -             |
| Cluster 25 | Cf_putative                | Meridamycin_biosynthetic_gene_cluster (5% of genes show similarity)         | BGC0001011_c1 |
| Cluster 26 | Cf_putative                | Polyoxypeptin_biosynthetic_gene_cluster (8% of genes show similarity)       | BGC0001036_c1 |
| Cluster 27 | Cf_saccharide              | Phosphonoglycans_biosynthetic_gene_cluster (6% of genes show similarity)    | BGC0000807_c1 |
| Cluster 28 | Bacteriocin-Terpene        | Lymphostin_biosynthetic_gene_cluster (30% of genes show similarity)         | BGC0001007_c1 |
| Cluster 29 | Cf_putative                | -                                                                           | -             |
| Cluster 30 | Cf_putative                | -                                                                           | -             |
| Cluster 31 | Cf_fatty_acid-Nrps         | Diazepinomicin_biosynthetic_gene_cluster (77% of genes show similarity)     | BGC0000679_c1 |
| Cluster 32 | Oligosaccharide-Cf_fatty_a | Lobosamide_biosynthetic_gene_cluster (13% of genes show similarity)         | BGC0001303_c1 |
| Cluster 33 | Cf_saccharide              | -                                                                           | -             |
| Cluster 34 | Cf_putative                | Kanamycin_biosynthetic_gene_cluster (5% of genes show similarity)           | BGC0000705_c1 |

|            |                  |                                                                                              |               |
|------------|------------------|----------------------------------------------------------------------------------------------|---------------|
| Cluster 35 | Cf_putative      | -                                                                                            | -             |
| Cluster 36 | Siderophore-Nrps | Azicemicin_biosynthetic_gene_cluster (13% of genes show similarity)                          | BGC0000202_c1 |
| Cluster 37 | Cf_putative      | Lasalocid_biosynthetic_gene_cluster (3% of genes show similarity)                            | BGC0000087_c1 |
| Cluster 38 | Cf_putative      | Kanamycin_biosynthetic_gene_cluster (15% of genes show similarity)                           | BGC0000706_c1 |
| Cluster 39 | Cf_putative      | -                                                                                            | -             |
| Cluster 40 | T1pks-Nrps       | Phenalamide_biosynthetic_gene_cluster (33% of genes show similarity)                         | BGC0001394_c1 |
| Cluster 41 | T1pks            | Incednine_biosynthetic_gene_cluster (6% of genes show similarity)                            | BGC0000078_c1 |
| Cluster 42 | Cf_putative      | -                                                                                            | -             |
| Cluster 43 | Cf_putative      | Pyrrrolomycin_biosynthetic_gene_cluster (18% of genes show similarity)                       | BGC0000132_c1 |
| Cluster 44 | Cf_putative      | -                                                                                            | -             |
| Cluster 45 | T1pks-Nrps       | Bleomycin_biosynthetic_gene_cluster (12% of genes show similarity)                           | BGC0000963_c1 |
| Cluster 46 | Cf_putative      | -                                                                                            | -             |
| Cluster 47 | Cf_putative      | -                                                                                            | -             |
| Cluster 48 | Cf_putative      | Coumermycin_A1_biosynthetic_gene_cluster (12% of genes show similarity)                      | BGC0000833_c1 |
| Cluster 49 | Cf_putative      | Echosides_biosynthetic_gene_cluster (11% of genes show similarity)                           | BGC0000340_c1 |
| Cluster 50 | Terpene          | Nocathiacin_biosynthetic_gene_cluster (4% of genes show similarity)                          | BGC0000609_c1 |
| Cluster 51 | Cf_putative      | -                                                                                            | -             |
| Cluster 52 | Cf_putative      | -                                                                                            | -             |
| Cluster 53 | Cf_putative      | Rifamycin_biosynthetic_gene_cluster (15% of genes show similarity)                           | BGC0000137_c1 |
| Cluster 54 | T3pks            | Alkyl-O-Dihydrogeranyl-Methoxyhydroquinones_biosynthetic_gene (71% of genes show similarity) | BGC0001077_c1 |
| Cluster 55 | Cf_putative      | -                                                                                            | -             |
| Cluster 56 | Cf_putative      | -                                                                                            | -             |
| Cluster 57 | Cf_putative      | -                                                                                            | -             |
| Cluster 58 | Terpene          | Sioxanthin_biosynthetic_gene_cluster (100% of genes show similarity)                         | BGC0001087_c4 |
| Cluster 59 | Cf_putative      | -                                                                                            | -             |
| Cluster 60 | Cf_fatty_acid    | Avilamycin_A_biosynthetic_gene_cluster (5% of genes show similarity)                         | BGC0000026_c1 |
| Cluster 61 | Cf_putative      | Spinosad_biosynthetic_gene_cluster (8% of genes show similarity)                             | BGC0000148_c1 |
| Cluster 62 | Other            | -                                                                                            | -             |
| Cluster 63 | Cf_putative      | -                                                                                            | -             |

In blue: differential cluster with previously described in *Micromonospora*<sup>16</sup>

**Table S3.** Number of genes of *Micromonospora* isolates implicated in DNA repair and stress responses found in the genomes.

|                         |                                                                 | LB4 | LB19 | LB32 <sup>T</sup> | LB39 <sup>T</sup> | LB41 |
|-------------------------|-----------------------------------------------------------------|-----|------|-------------------|-------------------|------|
| <b>DNA repair</b>       |                                                                 |     |      |                   |                   |      |
| <i>alk B</i>            | Alkylated DNA repair protein                                    | 1   | 1    | 1                 | 1                 | 1    |
| <i>dcm</i>              | DNA-cytosine methyltransferase (EC 2.1.1.37)                    | 1   | 0    | 0                 | 1                 | 1    |
| <i>din J</i>            | DNA damage inducible protein                                    | 0   | 0    | 1                 | 1                 | 0    |
| <i>din P</i>            | DNA polymerase IV (EC 2.7.7.7)                                  | 2   | 2    | 2                 | 1                 | 2    |
| <i>end 1</i>            | Endonuclease III (EC 4.2.99.18)                                 | 0   | 1    | 1                 | 1                 | 1    |
| EndoIV                  | Endonuclease IV (EC 4.2.21.2)                                   | 2   | 2    | 2                 | 2                 | 2    |
| EndoV                   | Endonuclease V (EC 4.2.21.7)                                    | 1   | 1    | 1                 | 1                 | 1    |
| ExoIII                  | Exodeoxyribonuclease III (EC 3.1.11.2)                          | 1   | 1    | 1                 | 2                 | 1    |
| <i>gly 1</i>            | Formamidopyrimidine-DNA glycosylase (EC 3.2.2.23)               | 3   | 4    | 4                 | 3                 | 4    |
| <i>gly 2</i>            | Uracil-DNA glycosylase, family 1                                | 1   | 1    | 1                 | 1                 | 1    |
| <i>gly 3</i>            | DNA-3-methyladenine glycosylase (EC 3.2.2.20)                   | 1   | 1    | 1                 | 1                 | 1    |
| <i>gly 4</i>            | DNA-3-methyladenine glycosylase II (EC 3.2.2.21)                | 0   | 1    | 1                 | 1                 | 1    |
| Ku                      | Ku domain protein                                               | 1   | 1    | 1                 | 1                 | 1    |
| <i>lex A</i>            | SOS-response repressor and protease (EC 3,4,21,88)              | 1   | 1    | 1                 | 1                 | 1    |
| <i>lig 1</i>            | ATP-dependent DNA ligase (EC 6.5.1.1)                           | 3   | 5    | 5                 | 5                 | 4    |
| <i>lig 2</i>            | DNA ligase (EC 6.5.1.2)                                         | 1   | 1    | 1                 | 2                 | 1    |
| <i>lig C</i>            | ATP-dependent DNA ligase (EC 6.5.1.1)                           | 1   | 2    | 1                 | 3                 | 1    |
| <i>lig D</i>            | ATP-dependent DNA ligase (EC 6.5.1.1) clustered with Ku protein | 3   | 2    | 2                 | 2                 | 3    |
| <i>mug</i>              | G:T/U mismatch-specific uracil/thymine DNA-glycosylase          | 1   | 2    | 2                 | 2                 | 1    |
| <i>mut Y</i>            | A/G-specific adenine glycosylase (EC 3.2.2.-)                   | 0   | 1    | 0                 | 1                 | 0    |
| <i>ogt</i>              | Methylated-DNA-protein-cystein methyltransferase (EC 2.1.163)   | 2   | 3    | 3                 | 3                 | 3    |
| <i>pol 1</i>            | DNA polymerase I (EC 2.7.7.7)                                   | 2   | 3    | 3                 | 4                 | 3    |
| <i>rad A</i>            | DNA repair protein                                              | 1   | 1    | 2                 | 1                 | 1    |
| <i>rec A</i>            | DNA repair protein                                              | 1   | 1    | 1                 | 1                 | 1    |
| <i>rec F</i>            | DNA recombination and repair protein RecF                       | 1   | 1    | 1                 | 1                 | 1    |
| <i>rec N</i>            | DNA repair protein                                              | 1   | 1    | 1                 | 1                 | 1    |
| <i>rec O</i>            | DNA recombination and repair protein RecO                       | 1   | 1    | 1                 | 1                 | 1    |
| <i>rec Q</i>            | ATP-dependent DNA helicase RecQ                                 | 3   | 3    | 3                 | 4                 | 4    |
| <i>rec R</i>            | Recombination protein RecR                                      | 1   | 1    | 1                 | 1                 | 1    |
| <i>rec X</i>            | Regulatory protein RecX                                         | 1   | 1    | 1                 | 1                 | 1    |
| <i>rmu C</i>            | DNA recombination protein                                       | 1   | 1    | 1                 | 1                 | 1    |
| <i>sbc C</i>            | Exonuclease                                                     | 0   | 1    | 1                 | 1                 | 1    |
| <i>sbc D</i>            | Exonuclease                                                     | 1   | 1    | 1                 | 1                 | 1    |
| SCO5183                 | ATP-dependent DNA helicase SCO5183                              | 1   | 1    | 1                 | 1                 | 1    |
| SCO5184                 | ATP-dependent DNA helicase SCO5184                              | 1   | 1    | 1                 | 1                 | 1    |
| <i>ssb</i>              | Single-stranded DNA-binding protein                             | 2   | 3    | 2                 | 3                 | 2    |
| UDG-1                   | Uracil-DNA glycosylase, family 1                                | 1   | 1    | 1                 | 1                 | 1    |
| UDG-2                   | G:T/U mismatch-specific uracil/thymine DNA-glycosylase          | 1   | 2    | 2                 | 2                 | 1    |
| UDG-5                   | Uracil-DNA glycosylase, family 5                                | 1   | 1    | 1                 | 1                 | 1    |
| UDG-6                   | Uracil-DNA glycosylase, putative family 6                       | 0   | 1    | 1                 | 1                 | 1    |
| <i>uvr A</i>            | Excinuclease ABC subunit A                                      | 1   | 2    | 1                 | 1                 | 1    |
| <i>uvr A</i> -para      | Excinuclease ABC subunit A paralog of unknown function          | 2   | 0    | 2                 | 2                 | 1    |
| <i>uvr B</i>            | Excinuclease ABC subunit B                                      | 1   | 1    | 1                 | 1                 | 1    |
| <i>uvr C</i>            | Excinuclease ABC subunit C                                      | 1   | 1    | 1                 | 1                 | 1    |
| <i>uvr D</i>            | ATP-dependent DNA helicase UvrD/PcrA                            | 1   | 2    | 2                 | 3                 | 1    |
| <i>uvr D</i> -actino    | ATP-dependent DNA helicase UvrD/PcrA, actinomycete paralog      | 1   | 1    | 1                 | 1                 | 1    |
| <i>xse A</i>            | Exodeoxyribonuclease VII large subunit (EC 3.1.11.6)            | 1   | 1    | 1                 | 1                 | 1    |
| <i>xse B</i>            | Exodeoxyribonuclease VII small subunit (EC 3.1.11.6)            | 1   | 1    | 1                 | 1                 | 1    |
| <i>yoa A</i>            | DinG family ATP-dependent helicase YoaA                         | 1   | 1    | 1                 | 1                 | 2    |
| <b>Stress responses</b> |                                                                 |     |      |                   |                   |      |
| -                       | CoA-disulfide reductase (EC 1.8.1.14)                           | 1   | 1    | 1                 | 1                 | 1    |
| 1_Cl1                   | Copper binding protein, plastocyanin/azurin family              | 1   | 2    | 1                 | 4                 | 1    |

|                  |                                                                                                         |   |   |   |   |   |
|------------------|---------------------------------------------------------------------------------------------------------|---|---|---|---|---|
| 1_Cl2            | Diguanylate cyclase/phosphodiesterase (GGDEF & EAL domains) with PAS/PAC sensor(s)                      | 2 | 2 | 1 | 5 | 2 |
| <i>ahp C</i>     | Alkyl hydroperoxide reductase subunit C-like protein                                                    | 3 | 4 | 4 | 4 | 3 |
| <i>aux</i>       | Cell wall endopeptidase, family M23/M37                                                                 | 0 | 0 | 0 | 0 | 1 |
| <i>aux</i>       | Similarity with glutathionylspermidine synthase (EC 6.3.1.8)                                            | 1 | 1 | 1 | 1 | 1 |
| <i>bet A</i>     | Choline dehydrogenase (EC 1.1.99.1)                                                                     | 0 | 0 | 0 | 1 | 1 |
| <i>bet C</i>     | Choline-sulfatase (EC 3.1.6.6)                                                                          | 1 | 1 | 2 | 2 | 1 |
| <i>chb</i>       | Cyanoglobin                                                                                             | 1 | 1 | 1 | 1 | 2 |
| <i>csp A</i>     | Cold shock protein                                                                                      | 4 | 5 | 4 | 3 | 4 |
| <i>csp C</i>     | Cold shock protein                                                                                      | 1 | 1 | 1 | 1 | 1 |
| <i>ded A</i>     | DedA protein                                                                                            | 2 | 4 | 4 | 4 | 2 |
| <i>dmaah</i>     | G,NG-dimethylarginine dimethylaminohydrolase 1 (EC 3.5.3.18)                                            | 2 | 2 | 2 | 2 | 2 |
| <i>dna J</i>     | Chaperone protein                                                                                       | 2 | 3 | 2 | 4 | 2 |
| <i>dna K</i>     | Chaperone protein                                                                                       | 1 | 2 | 1 | 4 | 2 |
| Fe_stress        | Phytochrome, two-component sensor histidine kinase (EC 2.7.3.-)                                         | 1 | 1 | 1 | 1 | 1 |
| Fe <sup>3+</sup> | ABC-type Fe <sup>3+</sup> -siderophore transport system, permease 2 comp.                               | 0 | 3 | 1 | 1 | 1 |
| <i>fur/zur</i>   | Transcriptional regulator, FUR family                                                                   | 3 | 3 | 3 | 3 | 3 |
| <i>gapdh</i>     | NAD-dependent glyceraldehyde-3-phosphate dehydrogenase (EC 1.2.1.12)                                    | 1 | 1 | 1 | 2 | 1 |
| <i>glo A</i>     | Lactoylglutathione lyase (EC 4.4.1.5)                                                                   | 1 | 2 | 3 | 3 | 1 |
| <i>glo B</i>     | Hydroxyacylglutathione hydrolase (EC 3.1.2.6)                                                           | 1 | 1 | 1 | 1 | 1 |
| <i>grp E</i>     | Heat shock protein                                                                                      | 1 | 1 | 1 | 1 | 1 |
| GT               | Glutathione S-transferase                                                                               | 1 | 1 | 1 | 1 | 1 |
| <i>hbo</i>       | Hemoglobin-like protein                                                                                 | 1 | 2 | 1 | 2 | 1 |
| <i>hgl X</i>     | GTP-binding protein HflX                                                                                | 1 | 1 | 1 | 1 | 1 |
| <i>hmp X</i>     | Flavoheмоprotein (Hemoglobin-like protein) (Flavoheмоglobin) (Nitric oxide dioxygenase) (EC 1.14.12.17) | 2 | 2 | 1 | 3 | 2 |
| <i>hpl</i>       | Peroxidase (EC 1.11.1.7)                                                                                | 1 | 1 | 1 | 1 | 1 |
| <i>hplI</i>      | Catalase (EC 1.11.1.6)                                                                                  | 3 | 3 | 3 | 2 | 2 |
| <i>hrc A</i>     | Heat-inducible transcription repressor                                                                  | 1 | 1 | 1 | 1 | 1 |
| <i>hsp R</i>     | HspR, transcriptional repressor of DnaK operon                                                          | 2 | 2 | 2 | 1 | 2 |
| <i>hyp1</i>      | Uncharacterized protein Rv0487/MT0505                                                                   | 0 | 1 | 1 | 0 | 1 |
| <i>hyp2</i>      | Putative hydrolase in cluster with formaldehyde/S-nitrosomycothiоl reductase                            | 0 | 2 | 1 | 0 | 1 |
| <i>lep A</i>     | Translation elongation factor                                                                           | 1 | 1 | 1 | 1 | 1 |
| Mca              | Mycothiоl S-conjugate amidase                                                                           | 0 | 1 | 1 | 0 | 1 |
| MPI              | Maleylpyruvate isomerase, mycothiоl-dependent (EC 5.2.1.4)                                              | 0 | 1 | 1 | 0 | 1 |
| <i>msc R1</i>    | S-nitrosomycothiоl reductase                                                                            | 0 | 1 | 1 | 0 | 1 |
| <i>msc R2</i>    | Formaldehyde dehydrogenase MscR, NAD/mycothiоl-dependent (EC 1.2.1.66)                                  | 0 | 1 | 1 | 0 | 1 |
| <i>msh A</i>     | Glycosyltransferase MshA involved in mycothiоl biosynthesis (EC 2.4.1.-)                                | 0 | 1 | 2 | 0 | 1 |
| <i>msh B</i>     | N-acetyl-1-D-myo-inosityl-2-amino-2-deoxy-alpha-D-glucopyranoside deacetylase                           | 0 | 1 | 1 | 0 | 1 |
| <i>msh C</i>     | L-cysteine:1D-myo-inosityl 2-amino-2-deoxy-alpha-D-glucopyranoside ligase                               | 0 | 1 | 1 | 0 | 1 |
| <i>msh D</i>     | Acetyl-CoA:Cys-GlcN-Ins acetyltransferase, mycothiоl synthase                                           | 0 | 1 | 1 | 0 | 2 |
| <i>mtr</i>       | NADPH-dependent mycothiоl reductase                                                                     | 0 | 1 | 1 | 0 | 1 |
| <i>npt 1</i>     | Nicotinate phosphoribosyltransferase (EC 2.4.2.11)                                                      | 1 | 1 | 1 | 1 | 1 |
| <i>nsr R</i>     | Nitrite sensitive transcriptional repressor                                                             | 0 | 0 | 0 | 1 | 2 |
| <i>oat</i>       | Ornithine aminotransferase (EC 2.6.1.13)                                                                | 1 | 1 | 1 | 1 | 1 |
| <i>omp A</i>     | Aquaporin Z                                                                                             | 0 | 1 | 1 | 1 | 0 |
| <i>opu A</i>     | Glycine betaine ABC transport system                                                                    | 0 | 0 | 0 | 1 | 0 |
| <i>opu D</i>     | Glycine betaine transporter                                                                             | 0 | 0 | 0 | 0 | 1 |
| orgH2O2          | Organic hydroperoxide resistance protein                                                                | 5 | 4 | 4 | 5 | 5 |
| <i>osm Y</i>     | Osmotically inducible protein Y                                                                         | 0 | 1 | 1 | 1 | 0 |
| <i>pnc1</i>      | Nicotinamidase (EC 3.5.1.19)                                                                            | 1 | 1 | 1 | 1 | 1 |
| <i>prmt12</i>    | Protein arginine N-methyltransferase 1 (EC 2.1.1.-)                                                     | 1 | 0 | 0 | 0 | 1 |
| <i>pro U</i>     | Glycine betaine ABC transport system protein                                                            | 2 | 4 | 4 | 9 | 3 |
| <i>prxcat</i>    | Catalase (EC 1.11.1.6) EC Number 1.11.1.6 / Peroxidase (EC 1.11.1.7)                                    | 3 | 4 | 4 | 4 | 3 |
| <i>psp</i>       | Putative SigmaB associated two-component system sensor protein                                          | 2 | 2 | 2 | 2 | 2 |
| <i>qor 2</i>     | NADPH: quinone oxidoreductase 2                                                                         | 0 | 2 | 1 | 2 | 0 |
| <i>qor R</i>     | Redox-sensing transcriptional regulator                                                                 | 0 | 1 | 1 | 1 | 0 |
| <i>qor R_p</i>   | Redox-sensing transcriptional regulator putative                                                        | 0 | 1 | 0 | 0 | 0 |
| <i>rdg B</i>     | Nucleoside 5-triphosphatase RdgB (dHATP, dITP, XTP-specific) (EC 3.6.1.15)                              | 1 | 1 | 1 | 1 | 1 |



|              |                                                                                                        |   |   |    |   |   |
|--------------|--------------------------------------------------------------------------------------------------------|---|---|----|---|---|
| <i>redox</i> | Redox-sensitive transcriptional regulator (AT-rich DNA-binding protein)                                | 1 | 1 | 1  | 1 | 1 |
| <i>RNAse</i> | Ribonuclease PH (EC 2.7.7.56)                                                                          | 1 | 1 | 1  | 1 | 1 |
| <i>rsb R</i> | Positive regulator of Sigma-B                                                                          | 1 | 1 | 1  | 1 | 1 |
| <i>rsb S</i> | Negative regulator of Sigma-B                                                                          | 1 | 1 | 1  | 1 | 1 |
| <i>rsb U</i> | Serine phosphatase, regulator of sigma unit                                                            | 8 | 9 | 11 | 8 | 9 |
| <i>rsb V</i> | Anti-Sigma B factor antagonist                                                                         | 3 | 2 | 4  | 2 | 3 |
| <i>rsb W</i> | Serine-protein kinase (EC 2.7.11.1)                                                                    | 2 | 2 | 2  | 2 | 2 |
| <i>rsm E</i> | Ribosomal RNA small subunit methyltransferase E (EC 2.1.1.-)                                           | 1 | 1 | 1  | 1 | 1 |
| <i>rsm I</i> | rRNA small subunit methyltransferase I                                                                 | 0 | 1 | 1  | 1 | 1 |
| <i>rsp A</i> | Starvation sensing protein                                                                             | 1 | 1 | 1  | 1 | 1 |
| <i>sam</i>   | Hypothetical radical SAM family enzyme in heat shock gene cluster, similarity with CPO of BS HemN-type | 0 | 1 | 2  | 2 | 1 |
| <i>sig B</i> | RNA polymerase sigma factor                                                                            | 5 | 5 | 3  | 3 | 5 |
| <i>sir2</i>  | NAD-dependent protein deacetylase of SIR2 family                                                       | 1 | 1 | 1  | 1 | 2 |
| <i>smo F</i> | Various polyols ABC transporter, permease component 1                                                  | 0 | 1 | 2  | 1 | 0 |
| <i>smp B</i> | tmRNA-binding protein SmpB                                                                             | 2 | 2 | 2  | 2 | 2 |
| <i>sod B</i> | Superoxide dismutase [Fe] (EC 1.15.1.1)                                                                | 2 | 1 | 0  | 0 | 2 |
| <i>sox R</i> | Redox-sensitive transcriptional activator                                                              | 2 | 1 | 3  | 1 | 2 |
| <i>sp</i>    | Signal peptidase-like protein                                                                          | 1 | 1 | 1  | 1 | 1 |
| <i>temp</i>  | protein similar to cysteinyl-tRNA synthetase and MshC                                                  | 0 | 1 | 1  | 0 | 1 |
| <i>zur</i>   | Zinc uptake regulation protein                                                                         | 1 | 1 | 1  | 1 | 1 |

**Figure S1.** RAPD profiles showing genetic variability between isolates LB4, LB19, LB32<sup>T</sup>, LB39<sup>T</sup> and LB 41.

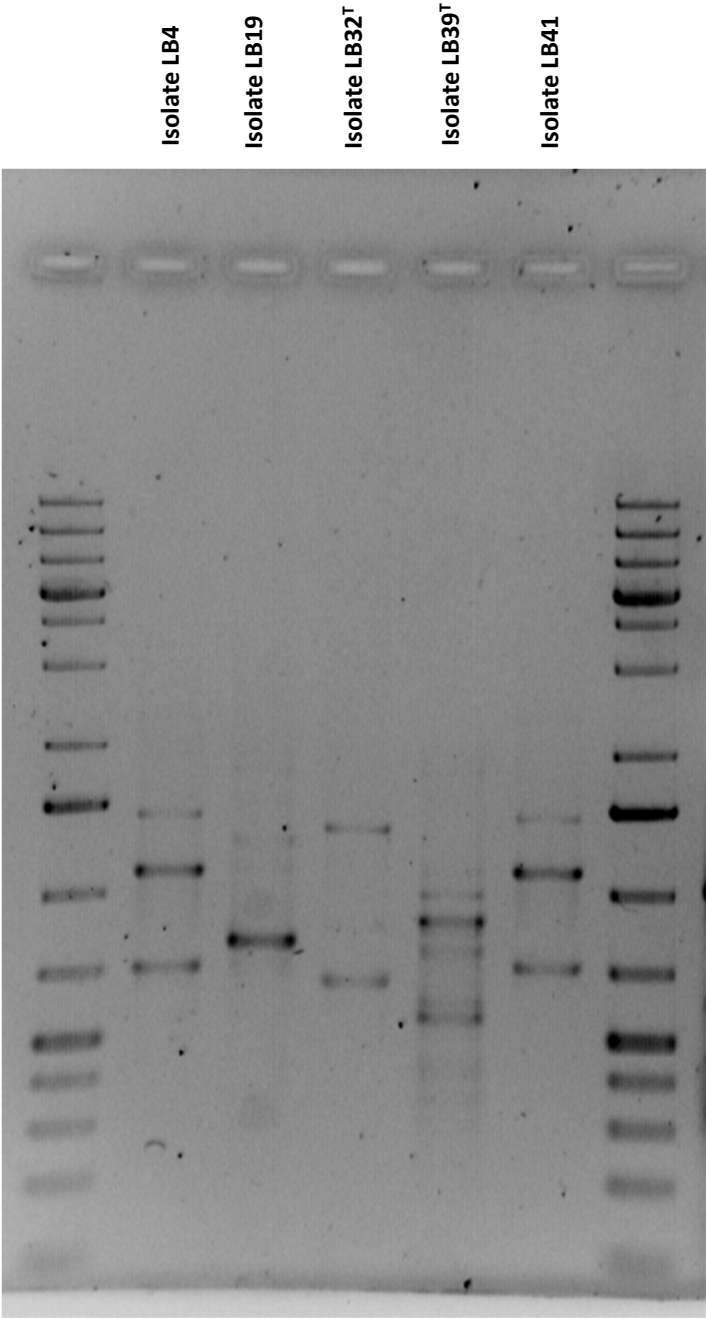

**Figure S2.** Neighbour-joining phylogenetic tree based on 16S rRNA gene sequences showing relationships between the isolates and between them and *Micromonospora* type strains. The numbers at the nodes indicate bootstrap values  $\geq 50\%$ . Asterisks indicate branches of the tree that were also recovered in the maximum-likelihood tree. Bar, 0.005 substitutions per nucleotide position.

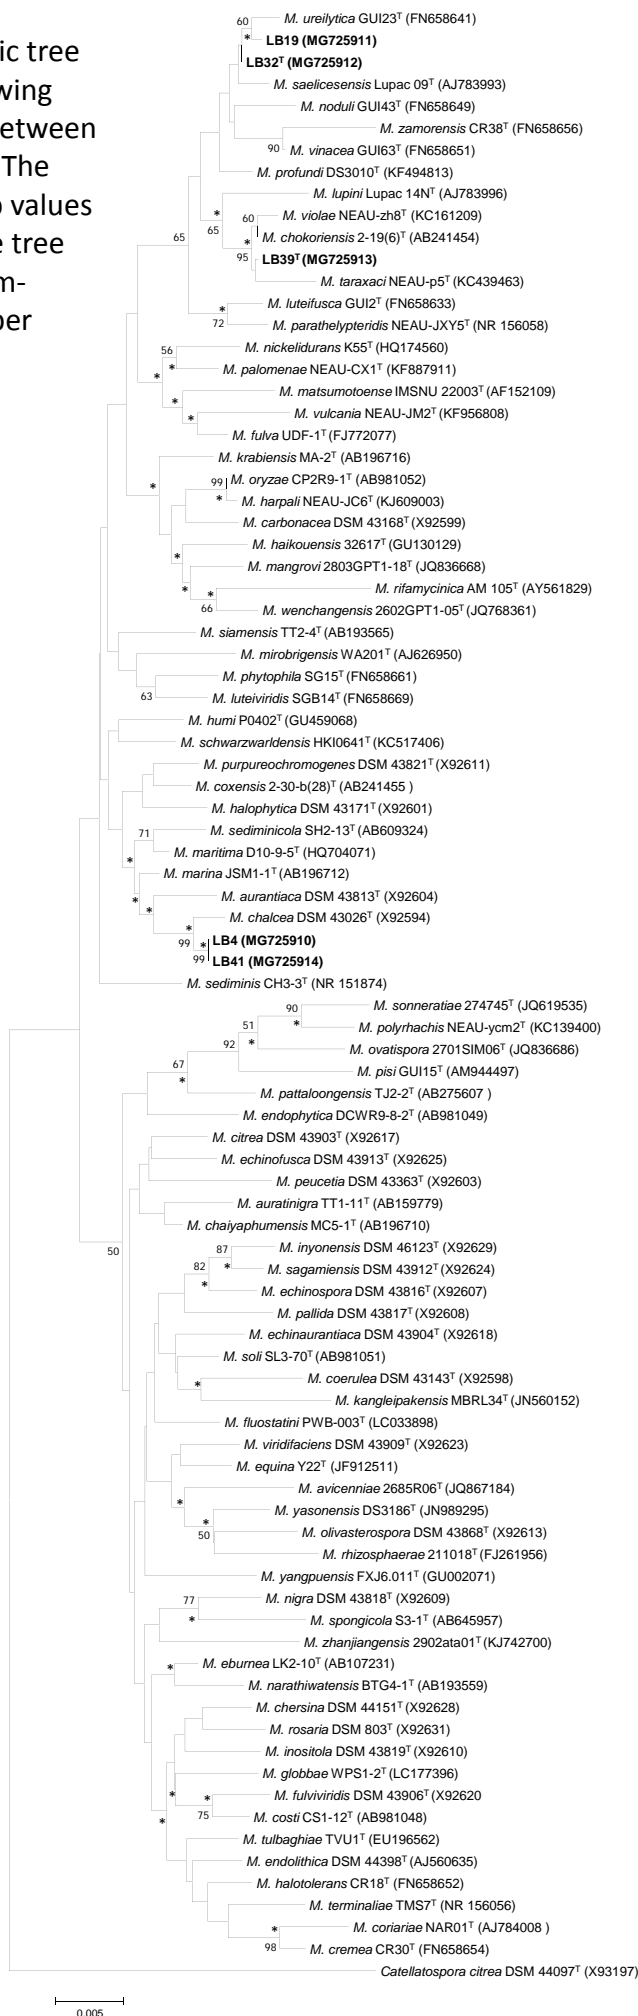

0.005
